# Supplementary material for: Characterization of the Catalytic Subunits of the RNA Exosome‐like Complex in Plasmodium falciparum
Source: PubMed Central journal article supplement (PMC6282785; doi:10.1111/jeu.12625), 2018-05-07

## SUPPORTING INFORMATION

**Characterization of the Catalytic Subunits of the RNA Exosome-like Complex in *Plasmodium falciparum*** by Ning Jiang, Shengchao Yu, Na Yang, Ying Feng, Xiaoyu Sang, Yao Wang, Mats Wahlgren, Qijun Chen

**Fig. S1 An alignment of the putative PIN domains between *Plasmodium* and other organisms (human and mouse).** The multi-sequence alignment is achieved by Mega 6.0.

**Fig. S2 Generation of GST-tagged fusion proteins.** (A) 12% SDS-PAGE analysis of the purified GST-tagged fusion proteins. The molecular weights of these GST fusion proteins are 60 kDa (PfRrp4), 48 kDa (PfRrp41), 57 kDa (PfRrp42), 70 kDa (PfDis3), and 51 kDa (PfRrp6). (B) Western blot analysis of the purified GST-tag fusion proteins with a GST-specific monoclonal antibody.

**Fig. S3 Analysis of the expression of native proteins in the asexual stages of *P. falciparum* 3D7 strain.** (A) Detection of PfRrp4, PfRrp41, PfRrp42, PfDis3 and PfRrp6 in parasites by Western blot. The predicted molecular masses are shown in Table 1. Negative IgG, pre-immune antibody control.



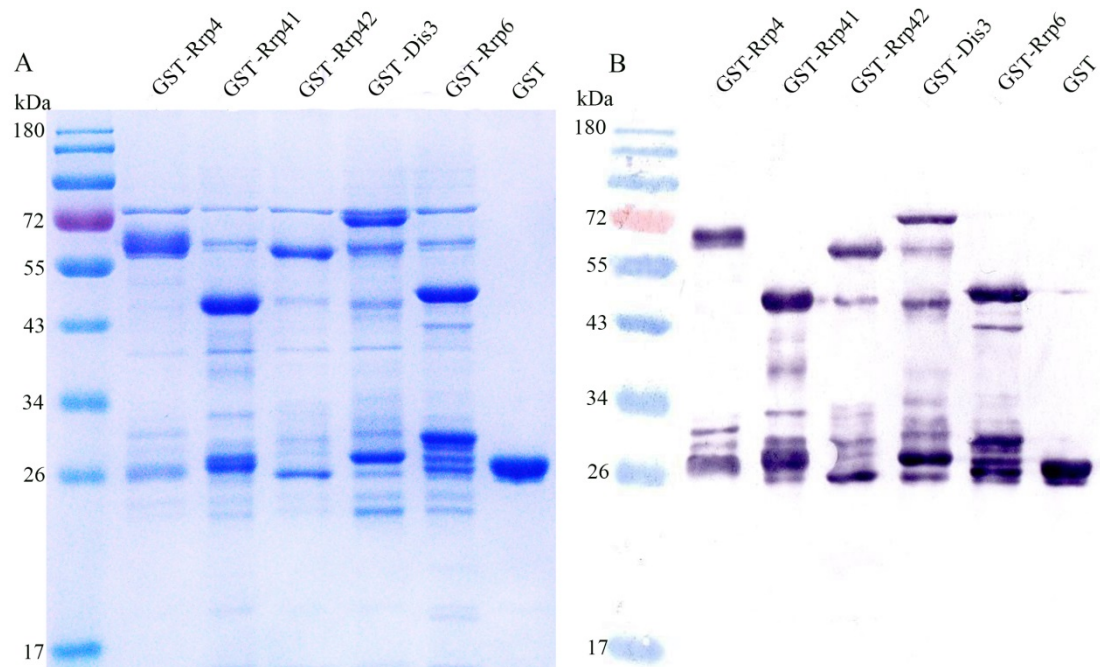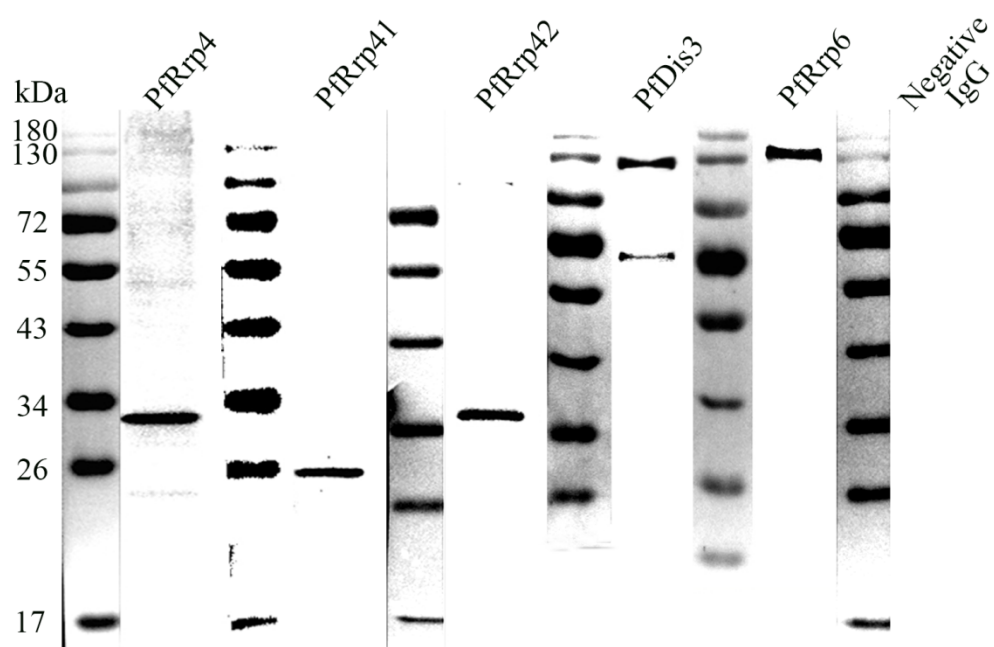

Supplement: JEU-65-843-s001.pdf [file JEU-65-843-s001.pdf]
